# Supplementary material for: Disease burden and quality of life of patients with chronic cough in Japan: a population-based cross-sectional survey
Source: PubMed Central journal article supplement — BMJ Open Respir Res. 2021 Mar 30;8(1):e000764. doi: 10.1136/bmjresp-2020-000764 (PMC8011713; doi:10.1136/bmjresp-2020-000764), 2021-03-30
Supplement: bmjresp-2020-000764supp001.pdf [file bmjresp-2020-000764supp001.pdf]

**Supplementary Table 1. HRQoL, WPAI and HRU, and other symptoms experienced in non-cough and sub-acute cough population.**

|                                                    | Matched non-cough<br>(N=1,512) |           | Sub-acute cough patients<br>(N=378) |           | P-value |
|----------------------------------------------------|--------------------------------|-----------|-------------------------------------|-----------|---------|
| <b>HRQoL</b>                                       | <b>Mean</b>                    | <b>SD</b> | <b>Mean</b>                         | <b>SD</b> |         |
| Physical Component Summary Score                   | 52.44                          | 5.95      | 50.89                               | 6.92      | < .001  |
| Mental Component Summary Score                     | 48.48                          | 9.33      | 45.47                               | 10.28     | < .001  |
| SF-6D Score (Health Utilities)                     | 0.77                           | 0.13      | 0.72                                | 0.13      | < .001  |
| EQ-5D-5L VAS                                       | 76.35                          | 20.21     | 70.21                               | 21.40     | < .001  |
| EQ-5D-5L Health Utilities                          | 0.87                           | 0.16      | 0.80                                | 0.16      | < .001  |
| Physical Functioning                               | 54.46                          | 6.19      | 54.04                               | 6.32      | 0.244   |
| Role Physical                                      | 52.08                          | 7.65      | 49.63                               | 8.64      | < .001  |
| Bodily Pain                                        | 51.37                          | 9.13      | 48.33                               | 9.78      | < .001  |
| General Health                                     | 46.67                          | 9.10      | 44.50                               | 9.85      | < .001  |
| Vitality                                           | 50.40                          | 10.42     | 47.64                               | 10.88     | < .001  |
| Social Functioning                                 | 50.80                          | 8.50      | 48.03                               | 9.49      | < .001  |
| Role Emotional                                     | 49.44                          | 9.40      | 46.45                               | 10.76     | < .001  |
| Mental Health                                      | 49.53                          | 9.72      | 47.38                               | 10.32     | < .001  |
| <b>WPAI</b>                                        |                                |           |                                     |           |         |
| Absenteeism (%) (N=971/248)                        | 3.39                           | 13.18     | 6.01                                | 15.33     | 0.007   |
| Presenteeism (%) (N=1,017/253)                     | 19.12                          | 24.53     | 28.74                               | 26.58     | < .001  |
| Total work productivity impairment (%) (N=961/247) | 20.29                          | 25.87     | 31.14                               | 28.48     | < .001  |
| Total activity Impairment (%)                      | 19.65                          | 24.68     | 29.76                               | 26.82     | < .001  |
| <b>HRU</b>                                         |                                |           |                                     |           |         |
| Number of HCP visits                               | 4.57                           | 7.18      | 7.47                                | 11.84     | < .001  |
| Number of ER visits                                | 0.05                           | 0.49      | 0.14                                | 1.10      | 0.019   |
| Number of hospitalizations                         | 0.08                           | 0.48      | 0.22                                | 1.11      | < .001  |
| <b>Other symptoms experienced</b>                  | <b>%</b>                       | <b>N</b>  | <b>%</b>                            | <b>N</b>  |         |
| Experienced anxiety in past 12 months              | 1.7%                           | 26        | 5.3%                                | 20        | < .001  |
| Experienced depression in past 12 months           | 4.4%                           | 67        | 6.3%                                | 24        | 0.119   |
| Experienced sleep problems or symptoms regularly   | 46.2%                          | 698       | 65.1%                               | 246       | < .001  |

**Supplementary Table 2. Cough related QoL (LCQ and HARQ) in chronic cough patients and correlation with severity**

| <b>HRQoL (N=562)</b>                    | <b>Chronic cough patients</b> |           | <b>Correlation with severity of cough over past 2 weeks</b> |                |
|-----------------------------------------|-------------------------------|-----------|-------------------------------------------------------------|----------------|
|                                         | <b>Mean</b>                   | <b>SD</b> | <b>Pearson Correlation</b>                                  | <b>p-value</b> |
| LCQ physical subscale score             | 5.08                          | 1.00      | -0.528                                                      | < .001         |
| LCQ psychological subscale score        | 4.97                          | 1.15      | -0.497                                                      | < .001         |
| LCQ social subscale score               | 5.41                          | 1.20      | -0.503                                                      | < .001         |
| LCQ total score                         | 15.45                         | 3.15      | -0.541                                                      | < .001         |
| HARQ total score                        | 16.54                         | 13.15     | 0.446                                                       | < .001         |
| <b>Severity VAS (0-100) (N=564)</b>     | <b>Mean</b>                   | <b>SD</b> | -                                                           | -              |
| Severity of cough over the past 2 weeks | 40.54                         | 21.60     | -                                                           | -              |

**Supplementary Table 3. HRQoL, cough related QoL, WPAI, HRU, and other symptoms experienced in CC patients whose underlying disease were unknown and all other CC patients.**

|                                                   | CC patients whose underlying diseases were unknown (N=54) |          | All other CC patients (N=514) † |          | P-value |
|---------------------------------------------------|-----------------------------------------------------------|----------|---------------------------------|----------|---------|
| HRQoL                                             | Mean                                                      | SD       | Mean                            | SD       |         |
| Physical Component Summary Score                  | 48.11                                                     | 7.12     | 49.20                           | 8.44     | 0.359   |
| Mental Component Summary Score                    | 46.53                                                     | 10.87    | 46.24                           | 10.72    | 0.850   |
| SF-6D Score (Health Utilities)                    | 0.73                                                      | 0.15     | 0.72                            | 0.13     | 0.645   |
| EQ-5D-5L VAS                                      | 64.87                                                     | 28.48    | 68.50                           | 23.04    | 0.282   |
| EQ-5D-5L Health Utilities                         | 0.80                                                      | 0.17     | 0.80                            | 0.16     | 0.989   |
| Physical Functioning                              | 51.23                                                     | 8.94     | 52.10                           | 8.29     | 0.468   |
| Role Physical                                     | 49.00                                                     | 9.55     | 48.83                           | 9.12     | 0.900   |
| Bodily Pain                                       | 47.54                                                     | 10.22    | 48.61                           | 10.04    | 0.460   |
| General Health                                    | 40.76                                                     | 10.36    | 42.04                           | 10.72    | 0.403   |
| Vitality                                          | 46.15                                                     | 11.41    | 47.31                           | 11.20    | 0.473   |
| Social Functioning                                | 48.99                                                     | 10.17    | 48.77                           | 9.64     | 0.870   |
| Role Emotional                                    | 46.37                                                     | 12.21    | 46.56                           | 10.85    | 0.900   |
| Mental Health                                     | 48.06                                                     | 11.53    | 47.48                           | 10.85    | 0.709   |
| <b>Cough related QoL</b>                          | <b>(N=54)</b>                                             |          | <b>(N=508)</b>                  |          |         |
| LCQ physical subscale score                       | 5.16                                                      | 0.90     | 5.07                            | 1.01     | 0.502   |
| LCQ psychological subscale score                  | 4.87                                                      | 0.99     | 4.98                            | 1.16     | 0.518   |
| LCQ social subscale score                         | 5.33                                                      | 1.06     | 5.42                            | 1.22     | 0.609   |
| LCQ total score                                   | 15.36                                                     | 2.72     | 15.46                           | 3.19     | 0.828   |
| HARQ total score                                  | 13.46                                                     | 10.56    | 16.86                           | 13.36    | 0.071   |
| <b>WPAI</b>                                       |                                                           |          |                                 |          |         |
| Absenteeism (%) (N=25/263)                        | 2.36                                                      | 7.08     | 4.75                            | 13.77    | 0.394   |
| Presenteeism (%) (N=26/280)                       | 26.15                                                     | 28.30    | 25.50                           | 27.22    | 0.907   |
| Total work productivity impairment (%) (N=25/261) | 27.64                                                     | 29.87    | 26.36                           | 28.08    | 0.829   |
| Total activity Impairment (%)                     | 29.63                                                     | 30.28    | 27.88                           | 27.06    | 0.655   |
| <b>HRU</b>                                        |                                                           |          |                                 |          |         |
| Number of HCP visits                              | 11.59                                                     | 10.83    | 7.30                            | 9.56     | 0.002   |
| Number of ER visits                               | 1.30                                                      | 9.53     | 0.10                            | 0.63     | 0.005   |
| Number of hospitalizations                        | 0.11                                                      | 0.46     | 0.14                            | 0.78     | 0.789   |
| <b>Other symptoms experienced</b>                 | <b>%</b>                                                  | <b>N</b> | <b>%</b>                        | <b>N</b> |         |
| Experienced anxiety in past 12 months             | 3.7%                                                      | 2        | 3.9%                            | 20       | 0.946   |
| Experienced depression in past 12 months          | 11.1%                                                     | 6        | 8.0%                            | 41       | 0.426   |
| Experienced sleep problems or symptoms regularly  | 61.1%                                                     | 33       | 66.7%                           | 343      | 0.406   |

† All other CC patients included both patients who were informed by the physicians on the underlying diseases related to their cough and who had not communicated with physicians about their cough.
